# Supplementary material
Source: Springer Nature journal article supplement (https://www.springermedizin.de/resource/supplementary/12955_2006_293_MOESM4_ESM.pdf/9560076)

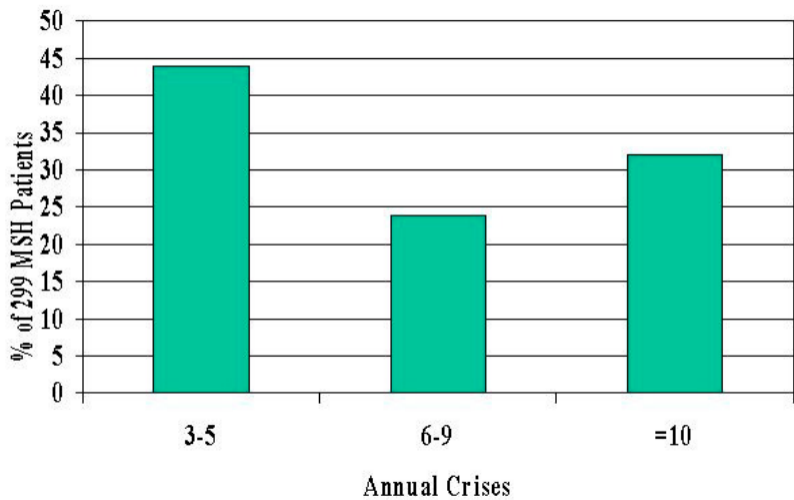

Supplement: MOESM4 [file 9560076]
